# Supplementary material
Source: PubMed Central journal article supplement (PMC7995581)
Supplement: 12905_2021_1265_MOESM1_ESM.pdf [file 12905_2021_1265_MOESM1_ESM.pdf]

# **A Novel Banana Fiber Pad for Menstrual Hygiene in India: A Feasibility and Acceptability study**

Krishnashree Achuthan<sup>1\*</sup>, Sharanya Muthupalani<sup>1</sup>, Vysakh Kani Kolil<sup>1</sup>,  
Anju Bist<sup>1</sup>, Krishna Sreesuthan<sup>1</sup>, Aswathy Sreedevi<sup>2</sup>

<sup>1</sup>Amrita School of Engineering, Amrita Vishwa Vidyapeetham, Amritapuri, Kollam, 690 525, India

<sup>2</sup>Department of Community Medicine, Amrita Institute of Medical Sciences and Research Centre,  
Amrita Vishwa Vidyapeetham, Ernakulam, 682 041, India

## **Survey Questions**

### **Part I: Demography**

1. **Age** :

2. **Education** :

3. **Profession** :

4. **Which of these are you familiar with using? (Please tick all that apply)**

Cloth absorbents that you can wash and use again.

Disposable sanitary pad

Menstrual Cup

Tampons

Others .....

5. **How much money were you spending per month on sanitary products previously?**

Less than ₹ 50

₹ 50- ₹ 100

More than ₹ 100

Cloth, so no expense

Don't know

**6. Are you the first in your family to use BFP (Banana Fibre based Menstrual Pad)?**

- Yes
- No
- Don't know

**7. How long you are using BFP?**

- Less than 4 months
- More than 4 months
- More than 1 year
- More than 2 years

**Part II: Characterization of Banana Fibre based Menstrual Pad (BFP)**

**A. Feasibility:**

**1. Preferred place of usage**

- Any time
- At work/college/school
- At home only
- At night only

**2. Experience with leakage**

- Same as disposable pads
- Less leakage than disposable pads
- More leakage than disposable pads
- No leakage at all

**3. Please indicate how long you use BFP without changing it?**

- Less than 3 hours
- 3 - 4 hours
- 5 - 6 hours
- More than 6 hours

**4. How much time does it take to wash BFP after use?**

- Less than 1 minute
- 1 - 2 minutes
- More than 2 minutes

**5. How do you wash your BFP?**

- Brush wash
- Soak first in water and then wash by hands
- Machine wash
- Stone wash and later soak in disinfectant water for sometime

**6. After washing, how long does it take for BFPs to dry?**

- 1 - 3 hours
- 4 - 6 hours
- More than 6 hours
- One day
- Don't know

**7. Where do you dry your BFPs?**

- In my room / bathroom
- In the open with other clothes, but I cover it with a towel
- In the open far from rest of the cloths
- In the drying machine

**B. Acceptability:**

**1. Which of the following is true of your current absorbent choice?**

- Both disposable pads and BFP
- BFP 80% of the time
- Menstrual cup and BFP
- Only BFP
- BFP and another brand of reusable pads

**2. How likely are you to recommend BFP to other women?**

- Very likely
- Likely
- Unlikely
- Very unlikely

**3. The BFPs are comfortable and easy to use and reuse**

- Strongly agree
- Agree
- Neutral
- Disagree
- Strongly disagree

**4. BFPs are easy to wash and clean**

- Strongly Agree
- Agree
- Neutral
- Disagree
- Strongly disagree

**5. Are others in the family now wanting to make switch to BFP?**

- Yes
- No
- Don't know

**6. How likely you will continue using the BFP?**

- Very likely
- Likely
- Unlikely
- Very unlikely

**7. Reason for preferring BFP (Please tick all that apply)**

- Easy to handle
- Absorbs better
- Feels clean
- Economical
- Eco-friendliness
- I feel traditional
- I feel modern

**8. Reason for recommending BFP (Please tick all that apply)**

- Concern for the environment
- Concern for the health
- Money spent every month
